# Supplementary material
Source: Research Square preprint supplement (doi:10.21203/rs.3.rs-10164936/v1)
Supplement: Supplementary file 1 [file b0659c9fe6699ed55bb5768d.docx]

Supplementary material

Contents

[Supplementary table 1. Medical speciality group interest. 2](#_Toc227148914)

[Supplementary table 2. Empathy scores by gender. 3](#_Toc227148915)

[Supplementary file 1. List of questions for interview and focus group. 3](#_Toc227148916)

[Supplementary file 2. List of questions for LMS synoptic feedback. 4](#_Toc227148917)

[Supplementary file 3. Additional quotes to support results of thematic analysis of interview and focus group data. 5](#_Toc227148918)

[Supplementary file 4. Free text comment results. 6](#_Toc227148919)

#

# Supplementary table 1. Medical speciality group interest.

| **Medical speciality group interest** | **Group** |
| --- | --- |
| General practice | Community-based |
| Public health |
| General surgery | Surgical |
| Neurosurgery |
| Obstetrics and gynaecology |
| Otolaryngology |
| Orthopaedic surgery |
| Plastic surgery |
| Urology |
| Anaesthetics | Medical |
| Dermatology |
| Emergency medicine |
| General medicine |
| Neurology |
| Ophthalmology |
| Pathology |
| Paediatrics |
| Radiology |
| Psychiatry | Mental health |

##

# Supplementary table 2. Empathy scores by gender.

| **Gender** | **Number of participants** | **Empathy score mean (SD)** | **Std. Error mean** |
| --- | --- | --- | --- |
| Female | 397 | 114.15 (9.92) | .498 |
| Male | 207 | 111.99 (11.42) | .794 |

# Supplementary file 1. List of questions for interview and focus group.

*Part A. Demographics*

For the record purpose, could you please state your ethnic group, gender and the year of study?

*Part B. Understanding the Empathy Curriculum*

Could you please explain what you know about the empathy curriculum at Leicester Medical School? (Based on the year of study)

Probe: Can you tell me what teaching you received this year as part of the empathy curriculum?

[Over this past academic year, the empathy curriculum consisted of a description of the empathy curriculum for that academic year, gathered from Andy Ward, and Jeremy Howick.]

*Part C. Teaching*

Thinking about the empathy curriculum that we discussed above, how engaging did you find the empathy curriculum?

Probe: Could you provide specific examples of teaching that you found particularly engaging or disengaging?

Can you tell me about any memorable or enjoyable teaching sessions within the empathy curriculum?

Probe: What made these memorable or enjoyable?

*Part D. Real-world application*

Could you provide examples where you've been able to apply the empathy skills you've learned in real-world medical scenarios? (Students in year 3, 4 and 5)

What are the challenges to applying empathy skills in real-world scenarios? (Students in year 3, 4 and 5)

Probe: Could you provide examples/more details?

Have you noticed any changes in your perspective, attitudes, or behaviours since completing the empathy curriculum?

Probe: Could you provide examples/explain more?

*Part E. Feedback and improvement*

To what extent do you think the empathy curriculum aligns with other areas of your medical training?

Probe: Could you provide examples/explain more?

Probe: How could this be improved?

Are there any aspects of the curriculum that you feel are missing or could be improved?

Probe: Could you provide examples/explain more?

Based on your experiences so far, what recommendations do you have for refining or enhancing the empathy curriculum for future students?

Probe: Is there anything that worked particularly well that we should carry forward?

Probe: Is there anything you think we should change or add to improve the curriculum for future students?

Probe: Could you provide examples/explain more?

# Supplementary file 2. List of questions for LMS synoptic feedback.

1. To what extent are you satisfied with the opportunities you have had on the course this year to learn about empathy? (Evaluated on a 5-point Likert scale from very satisfied to very dissatisfied.)
2. To what extent are you satisfied that your experience on the course this year will help you to become an empathic doctor? (Evaluated on a 5-point Likert scale from very satisfied to very dissatisfied.)

We also piloted a third free text option for Phase 2 students only:

1. Please enter any suggestions you may have for how to improve your opportunities to learn about empathy and become an empathic doctor (Free text comment).

# Supplementary file 3. Additional quotes to support results of thematic analysis of interview and focus group data.

**More consistent feedback on empathy**

*“I don't remember my tutor ever saying to anyone “you're not doing enough of that.” It's hard to get negative feedback, but it does help you if you know it earlier 'cause that's something you can work on.”* (Student 1)

**Evidence motivates empathy**

“[the lecturer was] *very passionate about it, which is very good. It certainly got me listening…”* (Student 8)

**Greater patient interaction**

*“…the key things would be small groups and a patient telling their story, us getting to ask questions, but just emphasis on it being a small group…”* (Student 17)

**Additional wellbeing support during clinical years**

*“It would be really useful to have someone to talk to about it and also like a scheduled time…if you have to go to something, it makes you reflect a bit more rather than thinking “I don't need that, I’ll be fine.” You almost get like traumatised by it and you kind of just don't want to think about it anymore, and that sort of hinders empathy…you need to talk it through so you can fully develop empathy.”* (Student 16)

# Supplementary file 4. Free text comment results.

**Greater patient involvement**

Similar to the theme “greater patient interaction” generated through analysis of the interview and focus group data, some students called for greater active patient involvement to improve their empathy teaching. However, unlike the theme “greater patient interaction” (which emphasises patient-student discussion in a classroom setting), in the free text data students suggested that simply hearing more patient experiences would be beneficial. They explained that this would enhance their understanding of the psychosocial impact of disease.

*“I think more personal stories from patients and other medical students would be good. Rather than focusing on why empathy is important (we know by third year!) I’d love to see some real-world stories and some patients’ real negative experiences with doctors to see what mistakes we commonly make and how to avoid them”* (Anonymous free text comment)

**Importance of formal empathy training for students and their role models**

Numerous students expressed an appreciation for the formal empathy lectures they received, highlighting that these helped to crystallise the potential benefits of empathy for patients and practitioners. However, it was also noted that that a lot “informal” learning about empathy happens on placement, when observing qualified practitioners who act as role models. Several students pointed out that while there were some excellent empathic role models on placement, there were also some who role modelled less empathic behaviours. It was therefore suggested that formal empathy training should be delivered to both students *and* their supervising practitioners on placement, to support the development of empathic skills in both formal and hidden curricula.

*“I found the talk on the university day interesting - I often think about how being more empathetic to patients will make me a better and…happier doctor...”* (Anonymous free text comment)

*“This curriculum should be extended to those most senior too, whose empathic muscles may have atrophied.”* (Anonymous free text comment)

**The need for longitudinal empathic communication skills training**

Several students called for more formal communication skills training in phase two, akin to the teaching they received in phase one. They did caveat this, however, by explaining that the medical school already provided excellent opportunities for the development of such skills, but that this was seemingly isolated to specific blocks of teaching (for example, in cancer care or older persons integrated care). Accordingly, some students suggested integrating empathic communication skills teaching throughout as many blocks as possible in phase two.

*“The cancer care week was the only real empathy teaching I felt we had over the 5 years, so maybe incorporate some more empathy teaching…throughout the course to really emphasise the importance…”* (Anonymous free text comment)

**Greater acknowledgement of the challenges of being a future doctor**

Several students highlighted the need for greater acknowledgement of the challenges faced as future doctors who will be working in increasingly overstretched healthcare systems, and the impact of these challenges on the expression of empathy in practice. Some students linked this suggestion for improvement to the academic who delivered the empathy lectures at the beginning of each medical school year. This academic is not a practitioner, and students were worried that their concerns about how to behave empathically under challenging circumstances were not fully understood or addressed. It was suggested that either framing the teaching more clearly as a presentation of the evidence for empathy (as opposed to strategies for being empathic) or involving a practitioner in the teaching, would address this problem.

*“Being told we would enjoy our jobs more if we were more empathetic and dismissing every other bad aspect of the job was a kick in the teeth. I personally feel the only way you will get doctors with really good empathy is when doctors…start to get treated better themselves.”* (Anonymous free text comment)

*“Empathy lectures* [were delivered by] *by someone who I am uncertain has worked clinically under the current NHS system/didn't seem to understand the extent of the current constraints.”* (Anonymous free text comment)
